# Supplementary figures and images for: U2AF65-Dependent SF3B1 Function in SMN Alternative Splicing
Source: MDPI journal article supplement (doi:10.3390/cells9122647), 2020-12-09

Supplementary Figure 1.

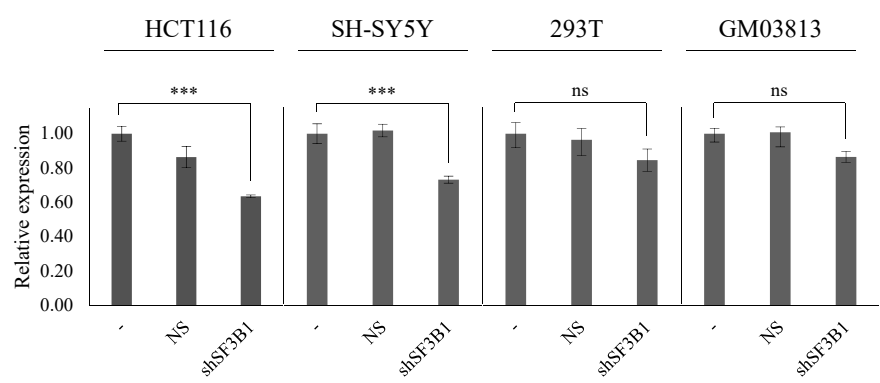

Supplement: s1 [file s1]
